# Supplementary material
Source: publisher site journal article supplement (https://www.dovepress.com/article/236275)
Supplement: Supplementary file 1 [file get_supplementary_file.php]

**Appendix-1** For the following questions, please put a check below the response which best describes your bladder symptoms over the past 7 days.

1. During the day, how often did you feel that you had to urinate right away?

None of the time some of the time most of the time all of the time

2. How often have you had urinary accidents/leakage?

None of the time some of the time most of the time all of the time

3. During the day, how strong was the feeling that you needed to urinate right away?

Not at all strong a little strong moderately strong extremely strong

4. On a typical nigh, how often did you wake up in the night to urinate?

None of the time one time two times three or more times

5. On a typical day, how many times did you urinate?

0-3 times 4-6 times 7-11 times +12 times

For the following questions, please put a check below the response with the best describes impacts from bladder symptoms you may have experienced over the past 7 days.

6. How much have your activities with friends and family been limited by your bladder problems?

Not at all a little moderate extremely

7. How embarrassed have you been because of your bladder symptoms?

Not at all a little moderate extremely

8. How much has your ability to work (paid or volunteer) outside the home had been limited by your bladder problems?

Not at all/ does not apply a little moderate extremely

Add the total number of boxes checked from the two right- hand columns in the shaded blue area?

Are you willing to receive help for your urinary problems? Yes No

**Appendix-2** Persian ABSST questionnaire (English translation)

**Please choose the best answer regarding your bladder conditions in the last 7 days.**

1. How many times in the day did you get the need to urinate right away?

Never Sometimes Most of the time Always

1. How often have you had urinary leakage?

Never Sometimes Most of the time Always

1. How strong was your urge to urinate right away during a typical day?

No urge Weak Moderate Strong

1. How many times in a typical night did you wake up to urinate?

Never Once Twice Three or more times

1. How many times in a day did you usually urinate?

0-3 times 4-6 times 7-11 times More than 12 times

**Please choose the best option that corresponds to your bladder symptoms in the last 7 days.**

1. How much have your activities with family and friends been limited due to your urinary problem?

Not at all Somewhat Moderately Extremely

1. How embarrassed have you been because of your urinary symptoms?

Not at all Somewhat Moderately Extremely

1. How much has your ability to work outside the home been limited by your urinary symptoms?

Not at all Somewhat Moderately Extremely

**Total score of the two right side blue columns**

Do you wish to receive help for your urination problem?

Yes No
